CORRECTION

# Correction: Experimental investigation and prediction of the flexural properties of FDM printed carbon fiber reinforced polyamide parts using optimized RSM and ANN models

The *PLOS One* Staff

The following information is missing from the Acknowledgement section: Researchers Supporting Project number (RSP2025R299), King Saud University, Riyadh, Saudi Arabia.

The publisher apologizes for the error.

## Reference

1. Al-Tamimi AA, Muhamedagic K, Begic-Hajdarevic D, Vatres A, Kadric E. Experimental investigation and prediction of the flexural properties of FDM printed carbon fiber reinforced polyamide parts using optimized RSM and ANN models. PLoS One. 2025;20(5):e0322628. <https://doi.org/10.1371/journal.pone.0322628> PMID: [40388513](https://pubmed.ncbi.nlm.nih.gov/40388513/)

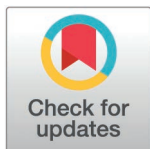

## OPEN ACCESS

**Citation:** The *PLOS One* Staff (2025) Correction: Experimental investigation and prediction of the flexural properties of FDM printed carbon fiber reinforced polyamide parts using optimized RSM and ANN models. PLoS One 20(9): e0333320. <https://doi.org/10.1371/journal.pone.0333320>

**Published:** September 25, 2025

**Copyright:** © 2025 The *PLOS One* Staff. This is an open access article distributed under the terms of the [Creative Commons Attribution License](https://creativecommons.org/licenses/by/4.0/), which permits unrestricted use, distribution, and reproduction in any medium, provided the original author and source are credited.
